# Supplementary material
Source: ML conference proceedings conference paper supplement (https://openaccess.thecvf.com/content/CVPR2023/html/Koneputugodage_Octree_Guided_Unoriented_CVPR_2023_paper.html)
Supplement: Supplementary file 2 [file Koneputugodage_Octree_Guided_Unoriented_CVPR_2023_supplemental.zip]

Archive with 3 entries (3 files):
- OG-INR_SuppMat_CameraReady_CVPR2023/OctreeAnchorVis.mp4
- OG-INR_SuppMat_CameraReady_CVPR2023/OctreeGargoyleVis.mp4
- OG-INR_SuppMat_CameraReady_CVPR2023/OG-INR_SuppMat_CameraReady_CVPR2023.pdf
